# Supplementary material
Source: MDPI journal article supplement (https://www.mdpi.com/2073-4344/13/12/1518)
Supplement: s1 [file s1]

## Supplementary material

# Stability of Ruthenium/Carbon Catalytic Materials during Operation in Carbon Monoxide Methanation Process

Elżbieta Truszkiewicz <sup>1,\*</sup>, Klaudia Latoszek <sup>1</sup>, Milena Ojrzyńska <sup>2</sup>, Andrzej Ostrowski <sup>1</sup> and Leszek Kępiński <sup>3</sup>

<sup>1</sup> Faculty of Chemistry, Warsaw University of Technology, Noakowskiego 3, 00-664 Warsaw, Poland; klaudia.latoszek.stud@pw.edu.pl (K.L.); andrzej.ostrowski@pw.edu.pl (A.O.)

<sup>2</sup> Faculty of Physics, Warsaw University of Technology, Koszykowa 75, 00-662 Warsaw, Poland; Milena.Ojrzyńska@pw.edu.pl

<sup>3</sup> Institute of Low Temperature and Structure Research, Polish Academy of Sciences, Okólna 2, 50-950 Wrocław, Poland; l.kepinski@intibs.pl

\* Correspondence: elzbieta.truszkiewicz@pw.edu.pl; Tel.: +48-22-2341786

Number of pages: 5

Number of figures: 3

Number of tables: 1

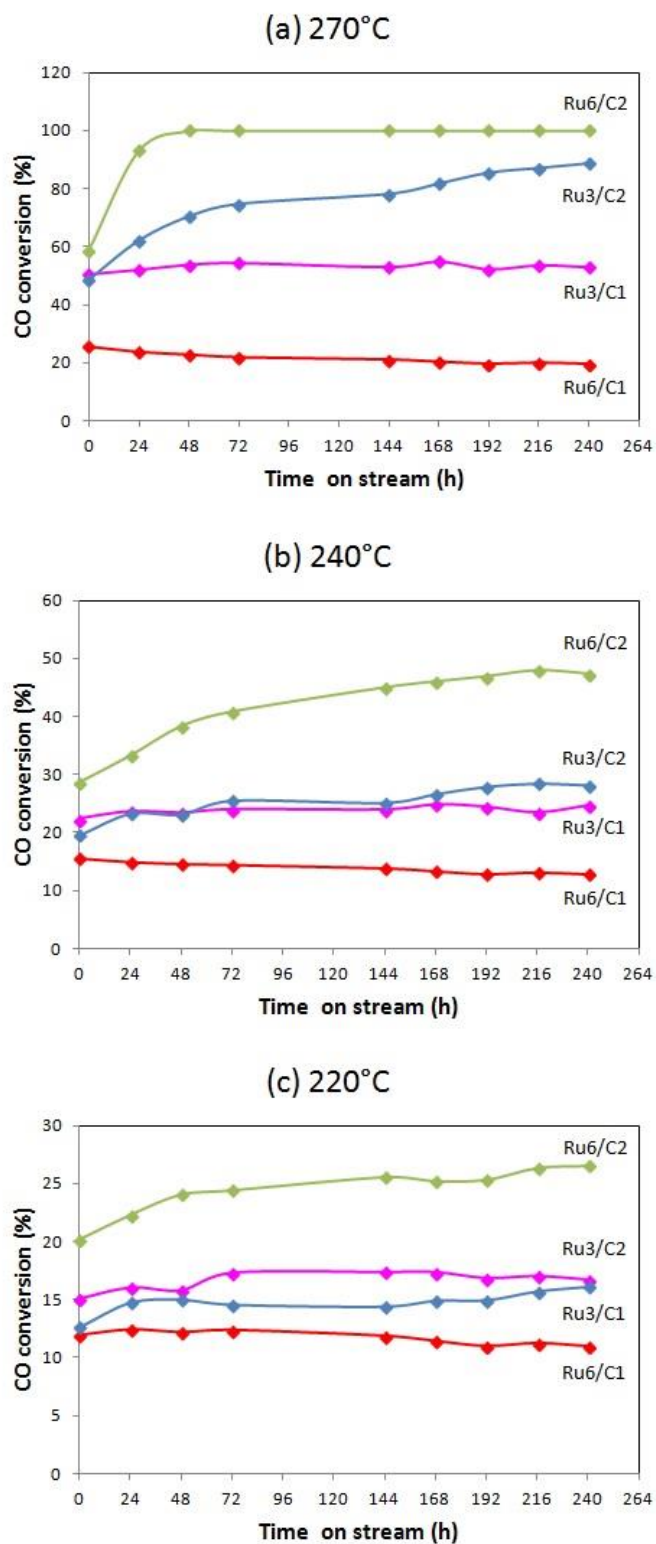

**Figure S1.** CO conversion changes during time of stream tests of the Ru/carbon catalysts (a) 270°C, (b) 240°C and (c) 220°C; Measurements conditions: 0.1 MPa, 5000 ppm CO in CO-H<sub>2</sub> mixture, 80 cm<sup>3</sup>/min; Overheating conditions: 300°C, 0.1 MPa, 5000 ppm CO in CO-H<sub>2</sub> mixture, 80 cm<sup>3</sup>/min.

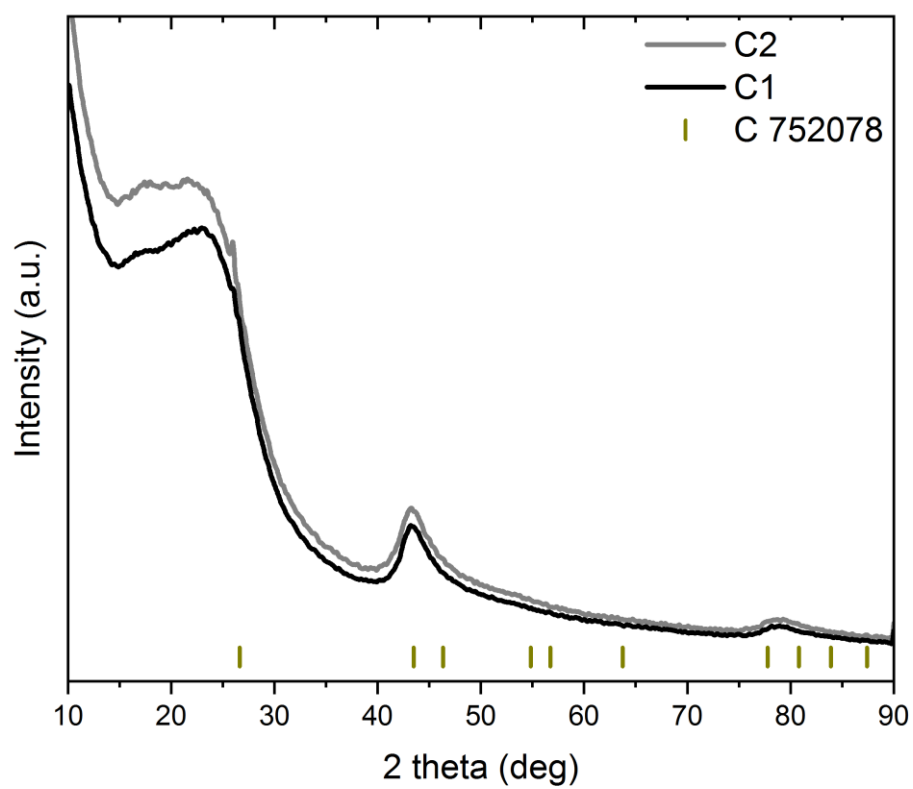

**Figure S2.** XRPD patterns of the carbon supports used for Ru/carbon systems preparation.

**Table S1.** Full width at half maximum of D ( $\Gamma_D$ ) and G ( $\Gamma_G$ ) bands and position of the G peak ( $\omega_G$ ) in Raman spectra.

| Sample | $\Gamma_D$ |       | $\Gamma_G$ |       | $\omega_G$<br>( $\text{cm}^{-1}$ ) |        |
|--------|------------|-------|------------|-------|------------------------------------|--------|
|        | Fresh      | Spent | Fresh      | Spent | Fresh                              | Spent  |
| C1     | 73.9       | –     | 61.7       | –     | 1583.4                             | –      |
| Ru3/C1 | 52.3       | 51.6  | 49.5       | 51.5  | 1577.0                             | 1581.3 |
| Ru6/C1 | 51.2       | 43.2  | 50.3       | 43.5  | 1580.5                             | 1580.1 |
| C2     | 50.2       | –     | 48.6       | –     | 1583.7                             | –      |
| Ru3/C2 | 67.1       | 55.7  | 60.6       | 46.1  | 1575.1                             | 1571.9 |
| Ru6/C2 | 60.4       | 45.1  | 60.7       | 41.2  | 1580.1                             | 1578.6 |

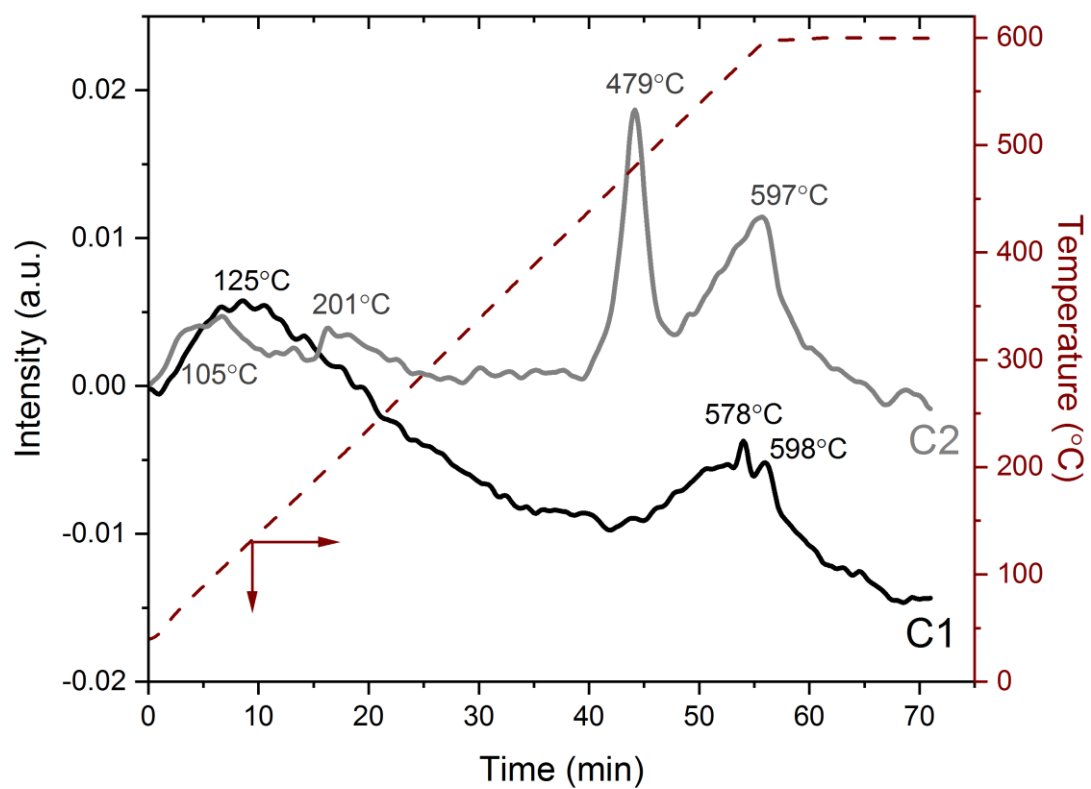

**Figure S3.** CO-TPD profiles of two carbon supports used in the study.
